# Supplementary material for: Does the healthcare system know what to cut under the pandemic emergency pressure? An observational study on geographic variation of surgical procedures in Italy
Source: HighWire-hosted journal article supplement (doi:10.1136/bmjopen-2022-061415), 2022-11-01
Supplement: bmjopen-2022-061415supp002_data_supplement.pdf [file bmjopen-2022-061415supp002_data_supplement.pdf]

**Supplementary material n. 2****Appendix- Codes of the ICD9CM and DRGs used for selecting cases, elective surgery.**

| <b>Procedure</b>     | <b>ICD9CM codes/DRG Grouper XXIV codes</b> | <b>Notes</b>                                                               |
|----------------------|--------------------------------------------|----------------------------------------------------------------------------|
| Tonsillectomy        | 28.2x; 28.3x                               | Patients aged 0-18                                                         |
| Vein stripping       | DRG 119                                    |                                                                            |
| Hysterectomy         | 68.3x-68.9x                                | All women aged 18 yrs and over with benign uterine conditions              |
| Knee replacement     | 81.54                                      | Total knee replacement                                                     |
| Hip replacement      | 81.51                                      | All patients aged 65 and over, excludes diagnosis codes 820-821.39, 996.4x |
| Colectomy            | 45.71-45.76; 45.79; 45.8x                  | All patients with ICD-9-CM Diagnosis Code 153: malignant neoplasm of colon |
| Coronary Angioplasty | 36.03; 36.04; 36.06; 36.07; 36.09; 00.66   |                                                                            |
| Cholecystectomy      | DRG: 493;494                               |                                                                            |
